# Supplementary material for: Shipboard design and fabrication of custom 3D-printed soft robotic manipulators for the investigation of delicate deep-sea organisms
Source: PLOS journal article supplement (doi:10.1371/journal.pone.0200386), 2018-08-01
Supplement: S2 (10.1371/journal.pone.0200386.s002) [file journal.pone.0200386.s002]

S1 Table: Summary of all the dives

| Dive ID | Max Depth | Gripper 1                      | Gripper 2                      | Sample                    | Grasping purpose  | Grasp Success |
|---------|-----------|--------------------------------|--------------------------------|---------------------------|-------------------|---------------|
| SB0067  | N/A       | 3 fingers                      | 5 fingers                      | N/A                       | N/A               | N/A           |
| SB0068  | 2021m     | 3 fingers                      | 5 fingers                      | N/A                       | N/A               | N/A           |
| SB0069  | 2294m     | 3 fingers                      | 5 fingers                      | N/A                       | N/A               | N/A           |
| SB0070  | 1189m     | 3 fingers                      | 5 fingers                      | N/A                       | N/A               | N/A           |
| SB0071  | 1725m     | 3 fingers                      | 5 fingers                      | N/A                       | N/A               | N/A           |
| SB0072  | 1430m     | 5 fingers                      | N/A                            | Deep sea Anemone          | Catch-and-release | No            |
|         |           | 5 fingers                      | N/A                            | Sea cucumber (Holothuria) | Catch-and-release | No            |
| SB0073  | 2440m     | 5 fingers                      | N/A                            | Sea cucumber (Holothuria) | Catch-and-release | Yes           |
|         |           | 5 fingers                      | N/A                            | Deep sea Anemone          | Catch-and-release | No            |
| SB0074  | 1361m     | Experimental gripper #1        | N/A                            | N/A                       | N/A               | N/A           |
| SB0075  | 643m      | 4 fingers                      | N/A                            | Coral rubble              | Post-study        | Yes           |
|         |           | 4 fingers                      | N/A                            | Coral                     | Post-study        | No            |
| SB0076  | 1517m     | N/A                            | N/A                            | N/A                       | N/A               | N/A           |
| SB0077  | 1424m     | 3 fingers                      | none                           | Coral rubble              | Post-study        | Yes           |
| SB0078  | 1378m     | Experimental gripper #1        | <b>3 fingers</b>               | Hard coral                | Post-study        | No            |
|         |           | Experimental gripper #1        | <b>3 fingers</b>               | Sponge                    | Post-study        | Yes           |
|         |           | <b>Experimental gripper #1</b> | 3 fingers                      | Crinoid                   | Catch-and-release | No            |
|         |           | <b>Experimental gripper #1</b> | 3 fingers                      | Sponge                    | Catch-and-release | No            |
| SB0079  | 1958m     | <b>3 fingers</b>               | Experimental gripper #2        | Acorn worm                | Post-study        | No            |
|         |           | 3 fingers                      | <b>Experimental gripper #2</b> | Coral                     | Post-study        | No            |
| SB0080  | 829m      | <b>3 fingers</b>               | Experimental gripper #2        | Fossil shelves            | Post-study        | Yes           |
| SB0081  | 1028m     | <b>3 fingers</b>               | Experimental gripper #1        | Crinoid                   | Catch-and-release | No            |
|         |           | <b>3 fingers</b>               | Experimental gripper #1        | Anemone                   | Catch-and-release | Partial       |
|         |           | <b>3 fingers</b>               | Experimental gripper #1        | Shrimp                    | Catch-and-release | No            |
|         |           | <b>3 fingers</b>               | Experimental gripper #1        | Rock                      | Post-study        | Partial       |
| SB0082  | 241m      | -                              | -                              | -                         | -                 | -             |
| SB0083  | 1473m     | <b>3D printed manipulator</b>  | 2 fingers adapted              | Sea star (Asteroidea)     | Post-study        | Yes           |
|         |           | <b>3D printed manipulator</b>  | 2 fingers adapted              | Sea cucumber (Holothuria) | Catch-and-release | Yes           |
|         |           | 3D printed manipulator         | <b>2 fingers adapted</b>       | Sea cucumber (Holothuria) | Catch-and-release | Yes           |
|         |           | 3D printed manipulator         | <b>2 fingers adapted</b>       | Hexactinellid sponge      | Catch-and-release | Yes           |

- ”# fingers” grippers denotes silicone based actuators fabricated in laboratory.
- The manipulator in use for a sampling is indicated in bold.
- A partial grasp success indicates that the sample was successfully grasped but fell during the transport to the biobox/quiver. In most of the cases it could be recovered later on.
- A post-study grasping purpose indicates that the sample is intended to be taken back to the surface for further biological study.
